# Supplementary material for: The Mutual Influence of Predominant Microbes in Sourdough Fermentation: Focusing on Flavor Formation and Gene Transcription
Source: MDPI journal article supplement (doi:10.3390/foods11152373), 2022-08-08
Supplement: s1 [file s1]

**Table S1.** Run summary on an Illumina MiSeq platform

| Sample<br>name | Total<br>reads | Total<br>alignments | Aligned | Unique<br>paired | Non-<br>unique<br>paired | Coverage | Average<br>coverage<br>depth | Aver-<br>age<br>length | GC<br>content |
|----------------|----------------|---------------------|---------|------------------|--------------------------|----------|------------------------------|------------------------|---------------|
| SCLS1          | 666,319        | 1,711,368           | 75.59%  | 65.17%           | 10.41%                   | 84.26%   | 204.65                       | 139.00                 | 42.95%        |
| SCLS2          | 563,182        | 1,522,988           | 70.55%  | 57.88%           | 12.67%                   | 83.32%   | 184.60                       | 139.54                 | 43.80%        |
| SCLS3          | 588,303        | 1,139,608           | 93.55%  | 92.39%           | 1.16%                    | 84.91%   | 135.98                       | 139.81                 | 38.46%        |
| LS1            | 588,507        | 1,499,598           | 76.88%  | 66.94%           | 9.94%                    | 84.68%   | 179.97                       | 140.46                 | 42.83%        |
| LS2            | 591,061        | 1,493,230           | 74.70%  | 64.61%           | 10.09%                   | 83.68%   | 181.40                       | 140.41                 | 43.30%        |
| LS3            | 689,489        | 1,971,612           | 71.98%  | 58.52%           | 13.46%                   | 84.84%   | 233.92                       | 138.93                 | 43.95%        |

**Table S2.** The significantly changed genes in the sourdoughs (co-fermentation vs. single starter)

| Gene_id     | Gene description                                                         | FC(SCLS/LS) | Pvalue   | Padjust  |
|-------------|--------------------------------------------------------------------------|-------------|----------|----------|
| LSA_RS01375 | N-acetyltransferase                                                      | 28.397      | 1E-12    | 4.03E-11 |
| LSA_RS01370 | ammonium transporter                                                     | 22.073      | 8.65E-57 | 4.52E-54 |
| LSA_RS02715 | glutamine--fructose-6-phosphate transaminase (isomerizing)               | 21.018      | 8.61E-61 | 8.99E-58 |
| LSA_RS00920 | amino acid ABC transporter permease                                      | 19.997      | 3.87E-05 | 0.000382 |
| LSA_RS00925 | amino acid ABC transporter ATP-binding protein                           | 17.537      | 9.91E-05 | 0.000863 |
| LSA_RS00930 | amino acid ABC transporter substrate-binding protein                     | 13.216      | 0.000192 | 0.001478 |
| LSA_RS06730 | amino acid ABC transporter ATP-binding protein                           | 6.879       | 6.81E-38 | 2.37E-35 |
| LSA_RS00235 | diaminopimelate decarboxylase                                            | 6.046       | 2.8E-06  | 3.75E-05 |
| LSA_RS06725 | glutamine ABC transporter substrate-binding protein                      | 5.736       | 9.14E-19 | 8.69E-17 |
| LSA_RS00340 | amino acid permease                                                      | 5.483       | 4.03E-15 | 2.34E-13 |
| LSA_RS03825 | GatB/YqeY domain-containing protein                                      | 5.392       | 3.79E-13 | 1.72E-11 |
| LSA_RS06720 | amino acid ABC transporter permease                                      | 5.018       | 4.64E-15 | 2.55E-13 |
| LSA_RS06080 | adenylosuccinate synthase                                                | 4.537       | 2.53E-24 | 3.78E-22 |
| LSA_RS02150 | MerR family DNA-binding transcriptional regulator                        | 4.52        | 1.18E-16 | 8.8E-15  |
| LSA_RS01190 | Cof-type HAD-IIB family hydrolase                                        | 4.248       | 1.56E-15 | 9.6E-14  |
| LSA_RS02155 | type I glutamate--ammonia ligase                                         | 4.167       | 3.99E-18 | 3.48E-16 |
| LSA_RS03165 | 5-formyltetrahydrofolate cyclo-ligase                                    | 4.003       | 0.004904 | 0.021003 |
| LSA_RS06715 | amino acid ABC transporter permease                                      | 3.996       | 2.22E-12 | 8.02E-11 |
| LSA_RS00240 | 2%2C3%2C4%2C5-tetrahydropyridine-2%2C6-dicarboxylate N-acetyltransferase | 3.79        | 1E-08    | 2.43E-07 |
| LSA_RS00210 | DUF536 domain-containing protein                                         | 3.637       | 0.000285 | 0.00196  |
| LSA_RS04000 | hypothetical protein                                                     | 3.599       | 1.33E-06 | 1.88E-05 |
| LSA_RS03770 | Nif3-like dinuclear metal center hexameric protein                       | 3.494       | 3.73E-05 | 0.000375 |
| LSA_RS03775 | SAM-dependent methyltransferase                                          | 3.395       | 0.001456 | 0.007495 |
| LSA_RS04470 | DNA polymerase IV                                                        | 3.333       | 0.000153 | 0.001251 |
| LSA_RS02720 | hypothetical protein                                                     | 3.166       | 0.000195 | 0.00148  |
| LSA_RS04010 | transcription termination/antitermination protein NusA                   | 3.115       | 7.39E-14 | 3.68E-12 |
| LSA_RS04005 | DUF448 domain-containing protein                                         | 3.09        | 3.11E-08 | 6.92E-07 |
| LSA_RS03650 | ribonuclease HII                                                         | 3.081       | 0.000169 | 0.001349 |
| LSA_RS01990 | CTP synthase                                                             | 2.956       | 5.56E-13 | 2.42E-11 |
| LSA_RS04015 | ribosome maturation factor RimP                                          | 2.917       | 2.21E-07 | 3.91E-06 |
| LSA_RS02760 | DUF805 domain-containing protein                                         | 2.842       | 8.72E-05 | 0.000779 |
| LSA_RS02490 | ABC transporter ATP-binding protein                                      | 2.828       | 5.22E-08 | 1.11E-06 |
| LSA_RS03810 | diacylglycerol kinase                                                    | 2.823       | 5.52E-07 | 8.88E-06 |
| LSA_RS02525 | PDZ domain-containing protein                                            | 2.796       | 4.06E-06 | 4.93E-05 |

|             |                                                                      |       |          |          |
|-------------|----------------------------------------------------------------------|-------|----------|----------|
| LSA_RS03985 | tRNA pseudouridine(55) synthase TruB                                 | 2.788 | 0.007411 | 0.029579 |
| LSA_RS02470 | co-chaperone GroES                                                   | 2.78  | 8.19E-10 | 2.19E-08 |
| LSA_RS06065 | 3-hydroxyacyl-[acyl-carrier-protein] dehydratase<br>FabZ             | 2.522 | 0.004671 | 0.020424 |
| LSA_RS03980 | bifunctional riboflavin kinase/FAD synthetase                        | 2.51  | 0.00047  | 0.002921 |
| LSA_RS01995 | UDP-N-acetylglucosamine 1-carboxyvinyltrans-<br>ferase               | 2.498 | 2.63E-11 | 8.57E-10 |
| LSA_RS00245 | N-acetyldiaminopimelate deacetylase                                  | 2.488 | 1.02E-06 | 1.52E-05 |
| LSA_RS02520 | peptide chain release factor 2                                       | 2.463 | 0.000214 | 0.001577 |
| LSA_RS04155 | MFS transporter                                                      | 2.431 | 0.001582 | 0.007986 |
| LSA_RS06780 | tRNA uridine-5-carboxymethylaminomethyl(34)<br>synthesis GTPase MnmE | 2.428 | 3E-07    | 5.06E-06 |
| LSA_RS03820 | PhoH family protein                                                  | 2.409 | 4.66E-07 | 7.61E-06 |
| LSA_RS02475 | chaperonin GroEL                                                     | 2.383 | 8.65E-07 | 1.35E-05 |
| LSA_RS02010 | MFS transporter                                                      | 2.374 | 0.000497 | 0.003057 |
| LSA_RS03510 | class I SAM-dependent RNA methyltransferase                          | 2.312 | 9.65E-08 | 1.9E-06  |
| LSA_RS03800 | DNA repair protein RecO                                              | 2.295 | 2.86E-06 | 3.75E-05 |
| LSA_RS03805 | GTPase Era                                                           | 2.261 | 2.55E-09 | 6.5E-08  |
| LSA_RS03425 | mevalonate kinase                                                    | 2.231 | 0.001575 | 0.007986 |
| LSA_RS04715 | DUF1727 domain-containing protein                                    | 2.182 | 1.11E-07 | 2.16E-06 |
| LSA_RS01185 | transcriptional regulator Spx                                        | 2.178 | 1.5E-07  | 2.7E-06  |
| LSA_RS06035 | acetyl-CoA carboxylase biotin carboxyl carrier<br>protein subunit    | 2.172 | 0.000635 | 0.003814 |
| LSA_RS03815 | rRNA maturation RNase YbeY                                           | 2.167 | 1.08E-05 | 0.000121 |
| LSA_RS04420 | DUF2507 domain-containing protein                                    | 2.167 | 0.005268 | 0.022021 |
| LSA_RS02535 | HPr kinase/phosphorylase                                             | 2.141 | 2.66E-07 | 4.56E-06 |
| LSA_RS06735 | cardiolipin synthase                                                 | 2.106 | 2.52E-05 | 0.000263 |
| LSA_RS00215 | L%2CD-transpeptidase                                                 | 2.102 | 9.03E-07 | 1.39E-05 |
| LSA_RS02100 | Hsp33 family molecular chaperone HslO                                | 2.102 | 2.32E-05 | 0.000245 |
| LSA_RS03515 | FAD-binding oxidoreductase                                           | 2.094 | 5.2E-06  | 6.25E-05 |
| LSA_RS02620 | triose-phosphate isomerase                                           | 2.092 | 0.000163 | 0.001308 |
| LSA_RS06460 | GMP reductase                                                        | 2.085 | 0.000141 | 0.001166 |
| LSA_RS06025 | acetyl-CoA carboxylase biotin carboxylase subu-<br>nit               | 2.04  | 3.11E-06 | 4.01E-05 |
| LSA_RS02000 | type B 50S ribosomal protein L31                                     | 2.014 | 3.72E-06 | 4.58E-05 |
| LSA_RS00195 | MFS transporter                                                      | 2.006 | 0.001442 | 0.007481 |
| LSA_RS06220 | stage V sporulation protein M                                        | 2.002 | 1.84E-05 | 0.000196 |
| LSA_RS03860 | N-acetylmuramoyl-L-alanine amidase                                   | 0.498 | 0.00342  | 0.015471 |
| LSA_RS00020 | DNA replication and repair protein RecF                              | 0.494 | 6.73E-05 | 0.000634 |
| LSA_RS04185 | hydroxymethylglutaryl-CoA synthase                                   | 0.493 | 2.8E-08  | 6.38E-07 |
| LSA_RS06425 | LysM peptidoglycan-binding domain-containing<br>protein              | 0.491 | 7.76E-10 | 2.13E-08 |
| LSA_RS01115 | divalent metal cation transporter                                    | 0.49  | 2.56E-06 | 3.47E-05 |
| LSA_RS00695 | sodium:proton antiporter                                             | 0.49  | 0.00022  | 0.001594 |

|             |                                                                                         |       |          |          |
|-------------|-----------------------------------------------------------------------------------------|-------|----------|----------|
| LSA_RS03445 | polyprenyl synthetase family protein                                                    | 0.487 | 8.8E-05  | 0.000779 |
| LSA_RS02455 | LemA family protein                                                                     | 0.484 | 0.000248 | 0.001772 |
| LSA_RS04970 | isoleucine--tRNA ligase                                                                 | 0.482 | 8.55E-08 | 1.72E-06 |
| LSA_RS01915 | DUF72 domain-containing protein                                                         | 0.473 | 8.72E-06 | 0.000102 |
| LSA_RS04875 | translational GTPase TypA                                                               | 0.466 | 8.56E-12 | 2.89E-10 |
| LSA_RS01580 | RluA family pseudouridine synthase                                                      | 0.462 | 0.003096 | 0.014126 |
| LSA_RS06345 | flippase                                                                                | 0.459 | 1.25E-07 | 2.34E-06 |
| LSA_RS01825 | DUF4811 domain-containing protein                                                       | 0.458 | 0.004981 | 0.021245 |
| LSA_RS03550 | ATP-grasp domain-containing protein                                                     | 0.457 | 3.7E-06  | 4.58E-05 |
| LSA_RS04575 | cysteine desulfurase                                                                    | 0.456 | 1.23E-05 | 0.000135 |
| LSA_RS04745 | ribonuclease Z                                                                          | 0.452 | 0.000803 | 0.004634 |
| LSA_RS03555 | DUF814 domain-containing protein                                                        | 0.449 | 2.54E-06 | 3.47E-05 |
| LSA_RS03405 | 23S rRNA methyltransferase                                                              | 0.445 | 0.000134 | 0.001123 |
| LSA_RS01300 | protein-tyrosine-phosphatase                                                            | 0.445 | 0.000444 | 0.002814 |
| LSA_RS00595 | acetyl-CoA C-acyltransferase                                                            | 0.444 | 2.74E-05 | 0.000284 |
| LSA_RS01225 | LTA synthase family protein                                                             | 0.434 | 1.2E-07  | 2.28E-06 |
| LSA_RS04730 | adenine phosphoribosyltransferase                                                       | 0.432 | 0.000618 | 0.003735 |
| LSA_RS04980 | RNA-binding protein                                                                     | 0.43  | 7.78E-08 | 1.59E-06 |
| LSA_RS03490 | penicillin-binding protein 1A                                                           | 0.424 | 1.02E-09 | 2.67E-08 |
| LSA_RS05940 | universal stress protein                                                                | 0.423 | 1.38E-05 | 0.00015  |
| LSA_RS04095 | transcriptional repressor LexA                                                          | 0.42  | 0.000117 | 0.000999 |
| LSA_RS00125 | sulfite exporter TauE/SafE family protein                                               | 0.414 | 0.000102 | 0.00088  |
| LSA_RS05025 | PASTA domain-containing protein                                                         | 0.413 | 6.92E-09 | 1.72E-07 |
| LSA_RS05935 | 3-methyladenine DNA glycosylase                                                         | 0.41  | 3.72E-06 | 4.58E-05 |
| LSA_RS05565 | energy-coupling factor transporter ATPase                                               | 0.409 | 0.011175 | 0.041413 |
| LSA_RS02670 | GNAT family N-acetyltransferase                                                         | 0.404 | 0.000176 | 0.001384 |
| LSA_RS06660 | NAD(P)-dependent oxidoreductase                                                         | 0.397 | 9.44E-06 | 0.00011  |
| LSA_RS06270 | methylated-DNA--[protein]-cysteine S-methyl-transferase                                 | 0.384 | 0.000338 | 0.002231 |
| LSA_RS02665 | tRNA (adenosine(37)-N6)-threonylcarbamoyltransferase complex ATPase subunit type 1 TsaE | 0.379 | 4.38E-05 | 0.00042  |
| LSA_RS04795 | 30S ribosomal protein S15                                                               | 0.373 | 6.58E-11 | 1.96E-09 |
| LSA_RS02305 | bifunctional lysylphosphatidylglycerol flip-pase/synthetase MprF                        | 0.372 | 4.6E-08  | 1E-06    |
| LSA_RS01455 | hypothetical protein                                                                    | 0.372 | 3.29E-06 | 4.2E-05  |
| LSA_RS01820 | MFS transporter                                                                         | 0.361 | 3.3E-11  | 1.01E-09 |
| LSA_RS03265 | guanylate kinase                                                                        | 0.361 | 2.81E-08 | 6.38E-07 |
| LSA_RS03310 | 50S ribosomal protein L28                                                               | 0.354 | 1.25E-06 | 1.8E-05  |
| LSA_RS01480 | APC family permease                                                                     | 0.341 | 2.22E-12 | 8.02E-11 |
| LSA_RS01450 | asparaginase                                                                            | 0.338 | 1.81E-08 | 4.3E-07  |
| LSA_RS06265 | glutamate/gamma-aminobutyrate family transporter YjeM                                   | 0.336 | 5.56E-12 | 1.94E-10 |
| LSA_RS04885 | lactate dehydrogenase                                                                   | 0.335 | 0.00018  | 0.001391 |

|             |                                                |       |          |          |
|-------------|------------------------------------------------|-------|----------|----------|
| LSA_RS00010 | DNA polymerase III subunit beta                | 0.305 | 3.92E-16 | 2.73E-14 |
| LSA_RS06130 | hypothetical protein                           | 0.301 | 1.31E-22 | 1.71E-20 |
| LSA_RS02735 | asparagine--tRNA ligase                        | 0.301 | 7.09E-21 | 8.23E-19 |
| LSA_RS00285 | amino acid permease                            | 0.299 | 1.66E-13 | 7.89E-12 |
| LSA_RS01400 | alpha/beta hydrolase                           | 0.29  | 0.000487 | 0.003011 |
| LSA_RS06470 | amino acid permease                            | 0.288 | 5.84E-07 | 9.25E-06 |
| LSA_RS03000 | DNA translocase FtsK                           | 0.279 | 7.53E-13 | 3.15E-11 |
| LSA_RS01535 | amino acid permease                            | 0.256 | 1.22E-10 | 3.54E-09 |
| LSA_RS00430 | hypothetical protein                           | 0.254 | 3.05E-07 | 5.06E-06 |
| LSA_RS00290 | ASCH domain-containing protein                 | 0.253 | 7.76E-08 | 1.59E-06 |
| LSA_RS01620 | threonine/serine exporter                      | 0.247 | 0.000283 | 0.001959 |
| LSA_RS01295 | tyrosine--tRNA ligase                          | 0.241 | 2.18E-10 | 6.17E-09 |
| LSA_RS00830 | IS256 family transposase                       | 0.218 | 2.41E-14 | 1.26E-12 |
| LSA_RS02660 | phosphate acetyltransferase                    | 0.209 | 9.22E-16 | 6.02E-14 |
| LSA_RS01530 | nitronate monooxygenase                        | 0.2   | 2.09E-17 | 1.68E-15 |
| LSA_RS00545 | ABC transporter ATP-binding protein            | 0.198 | 0.001283 | 0.006839 |
| LSA_RS04340 | amino acid permease                            | 0.195 | 3.89E-29 | 8.13E-27 |
| LSA_RS06125 | ABC transporter permease                       | 0.186 | 0.000294 | 0.001984 |
| LSA_RS04615 | D-alanine--D-alanine ligase A                  | 0.182 | 8.66E-26 | 1.51E-23 |
| LSA_RS04335 | aminoglycoside phosphotransferase              | 0.181 | 3.82E-29 | 8.13E-27 |
| LSA_RS05425 | DUF1304 domain-containing protein              | 0.173 | 2.71E-11 | 8.57E-10 |
| LSA_RS01215 | alpha/beta hydrolase                           | 0.152 | 1.6E-12  | 6.2E-11  |
| LSA_RS00005 | chromosomal replication initiator protein DnaA | 0.145 | 6.08E-20 | 6.35E-18 |
| LSA_RS00535 | hypothetical protein                           | 0.09  | 0.006301 | 0.025622 |

---
